# Supplementary material
Source: publisher figshare collection journal article supplement (https://frontiersin.figshare.com/ndownloader/files/24316298)
Supplement: Supplementary file [file 24316298]

## Supplementary Figures and Tables

A.

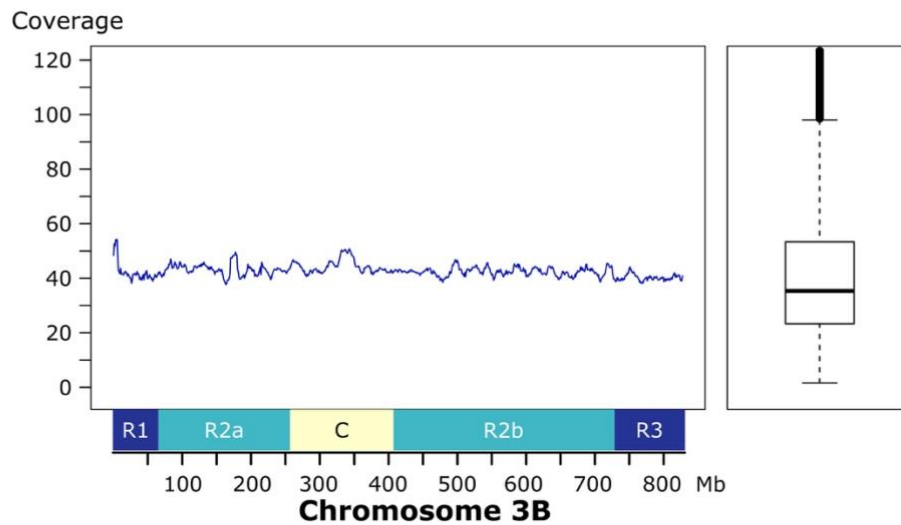

B. Frequency (Number of ISBPs)

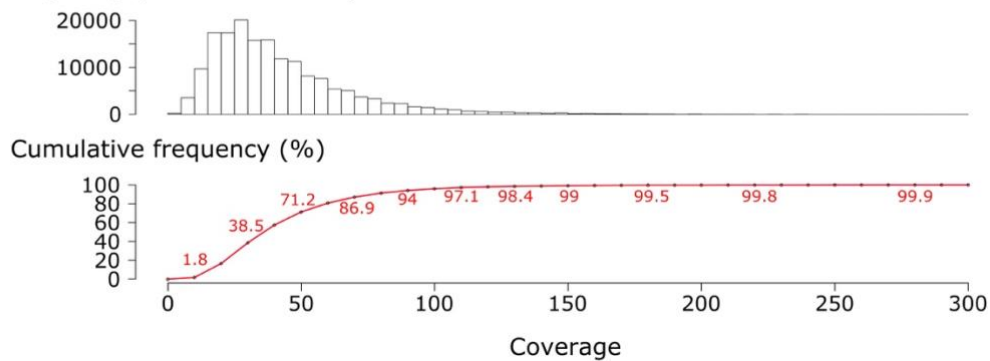

**Figure S1: Variations of the depth of coverage (DoC) across chromosome 3B in CS estimated using mapping data over 170,906 ISBPs.**

ISBPs are unique kmers (150 bps) at the genome-wide scale and, thus, are good candidates to evaluate DoC variations across chr3B. **A.** Distribution of DoC across chr3B for Chinese Spring (blue line) calculated in a sliding window of 10 Mb (step: 1 Mb). On the right is represented a boxplot of the DoC of all 10 Mb windows. **B.** Histogram and cumulative frequency plot (in red) of the DoC per window.

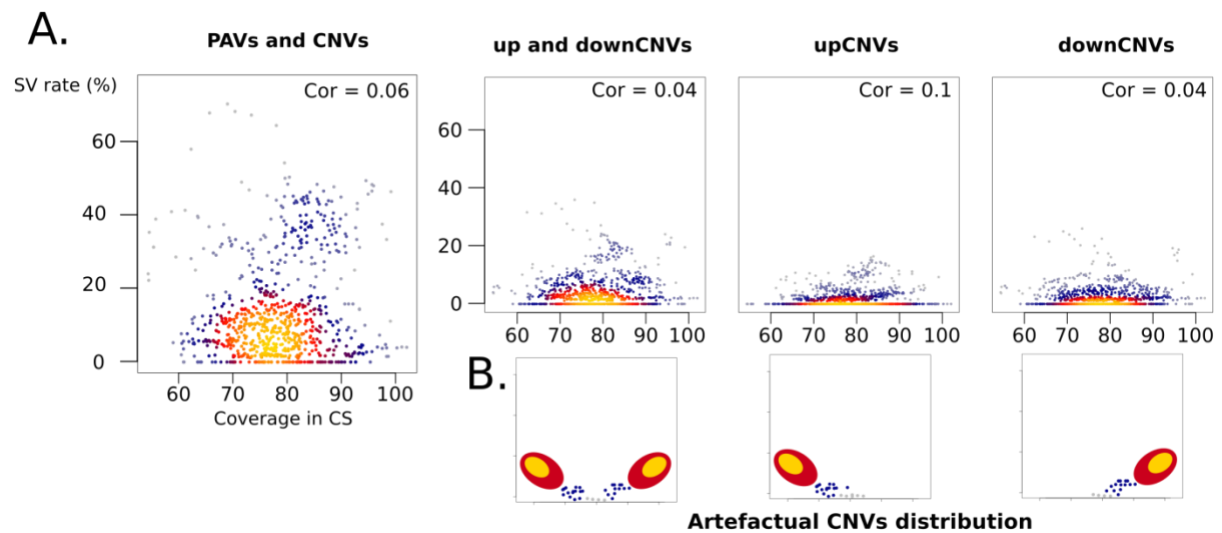

**Figure S2: Local variations of DoC in CS and correlation with the number of SVs**

**A.** Scatter plots representing the absence of correlation between the rate of SVs detected in 10 Mb windows and the DoC in CS. **B.** Schematic scatter plots representing the expected distribution if the detection of SVs would be biased by the DoC in CS. No correlation was detected between SVs and the variation of the DoC in CS.

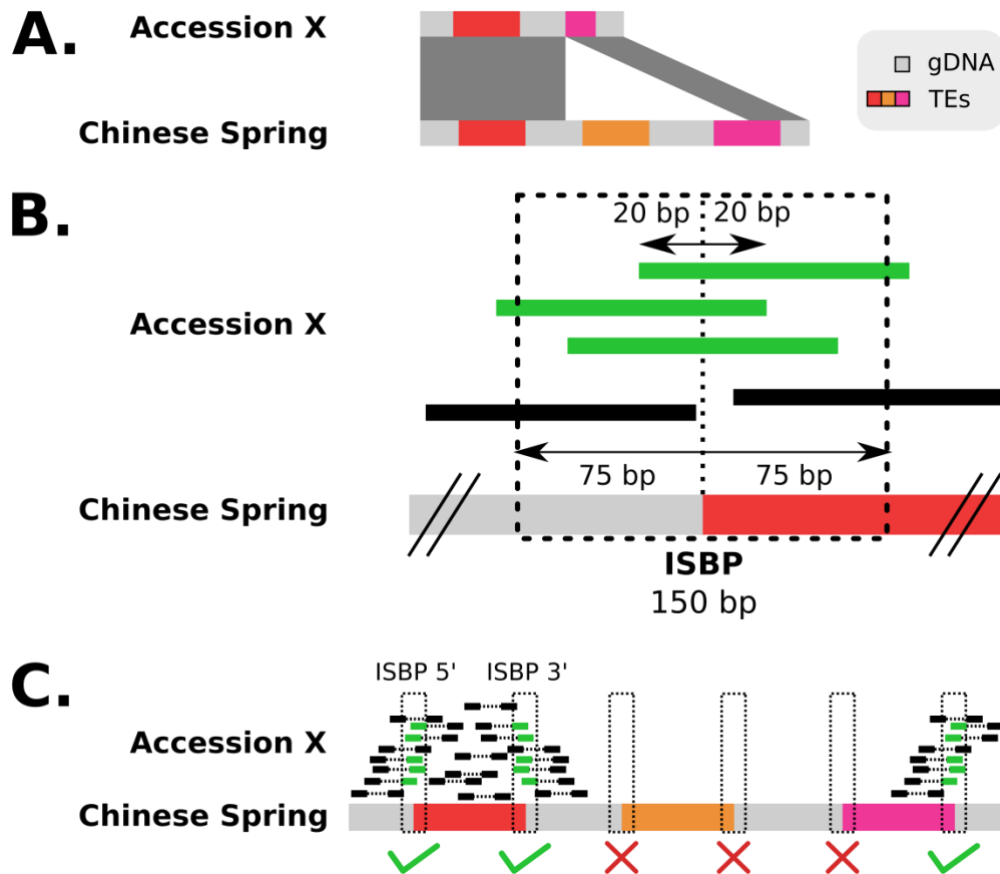

**Figure S3: Strategy developed for the identification of PAVs affecting TEs based on read mapping on ISBPs**

150 bps encompassing the extremity of a TE and its insertion site (75 bp on each side) was extracted at both the 5' and 3' ends of each TE, representing 5' and 3' ISBPs. An ISBP is a unique kmer at the genome-wide scale, contrary to the internal part of TEs. **A.** Example of an orthologous region between the reference CS and a query accession X. The region carries three TEs in the reference but only the red TE is conserved in X whereas the orange element is fully absent and the pink element is partially deleted. **B.** 101-bp reads were mapped on the 150-bp ISBPs and we considered only reads that mapped over more than 95 bps (represented in green, meaning at least 75+20 bps on each side of the junction *versus* reads represented in black that were filtered out). The presence of mapped reads indicates no TE InDel while absence of mapped reads is an evidence for InDel affected the ISBP. **C.** Presence of the red TE is revealed by reads mapped on both 5' and 3' ISBPs; complete TE-InDel of the orange element is revealed by the absence of mapped reads on both 5' and 3' ISBPs; partial TE-InDel of the pink element is revealed by reads mapped only on the 3' ISBP.

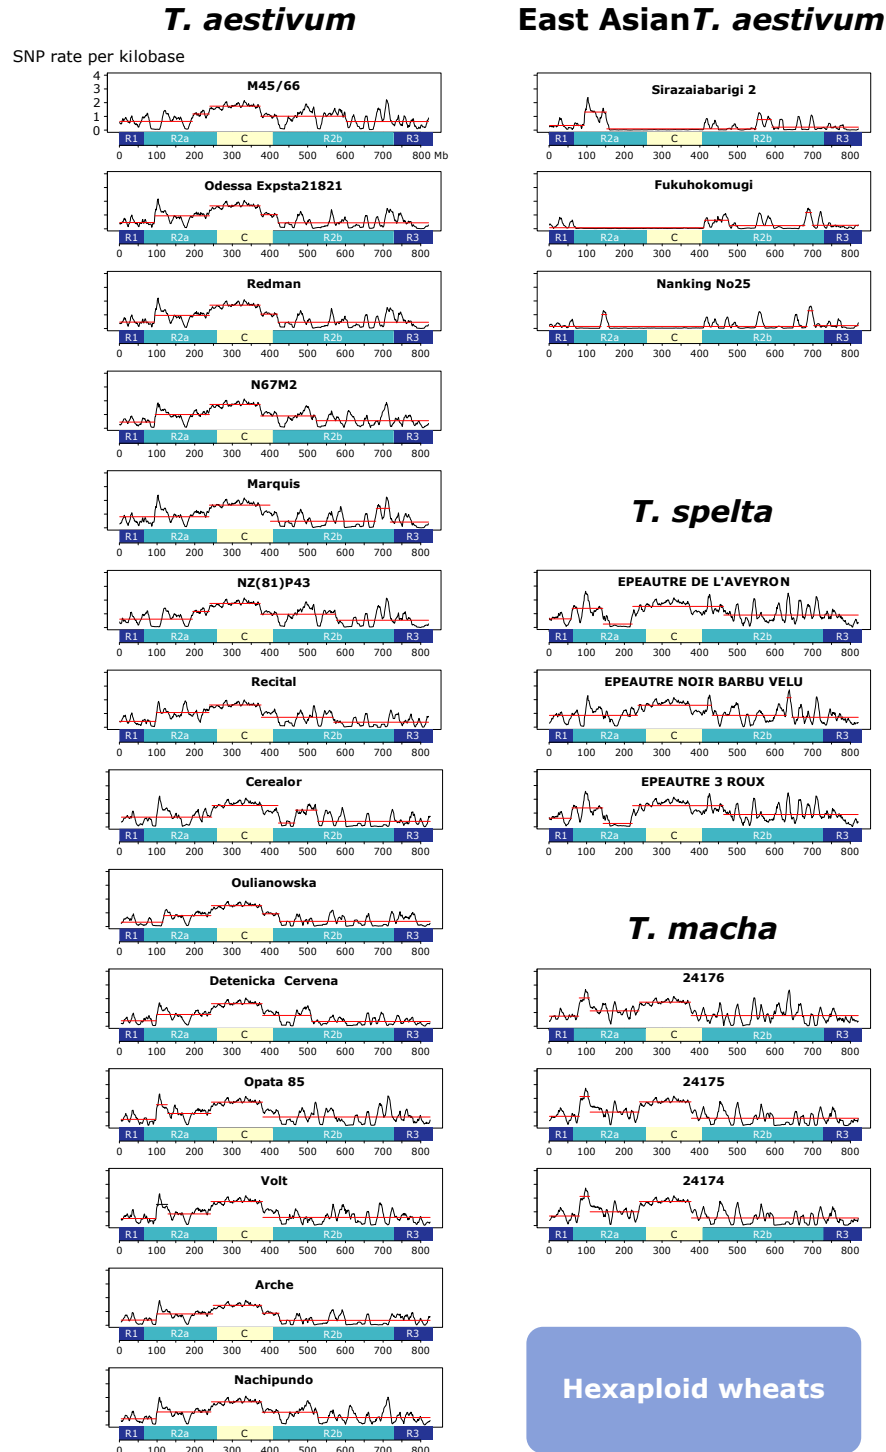

**Figure S4: SNP density across chromosome 3B for the 23 hexaploid accessions**  
 SNP density corresponds to the number of SNPs per kb calculated in a sliding window of 10 Mb (step=1 Mb). Segmentation was computed with R package ChangePoint (penalty: BIC, value: 0.05, method: SegNeigh) and segments are represented by red lines.

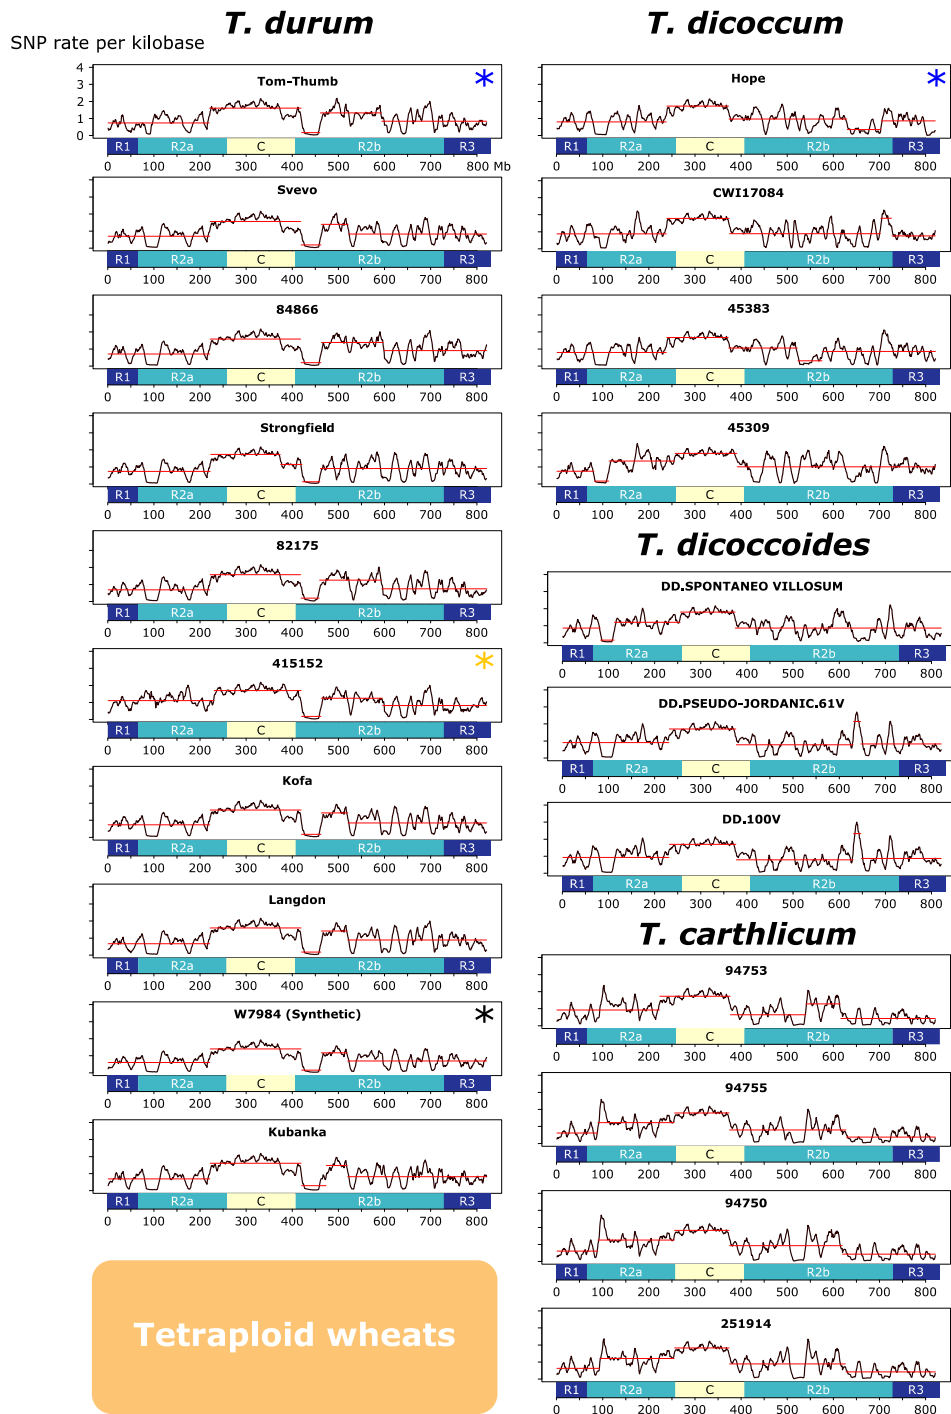

**Figure S5: SNP density across chromosome 3B for the 21 tetraploid accessions**  
 SNP density corresponds to the number of SNPs per kb calculated in a sliding window of 10 Mb (step=1 Mb). Segmentation was computed with R package Changeoint (penalty: BIC, value: 0.05, method: SegNeigh) and segments are represented by red lines

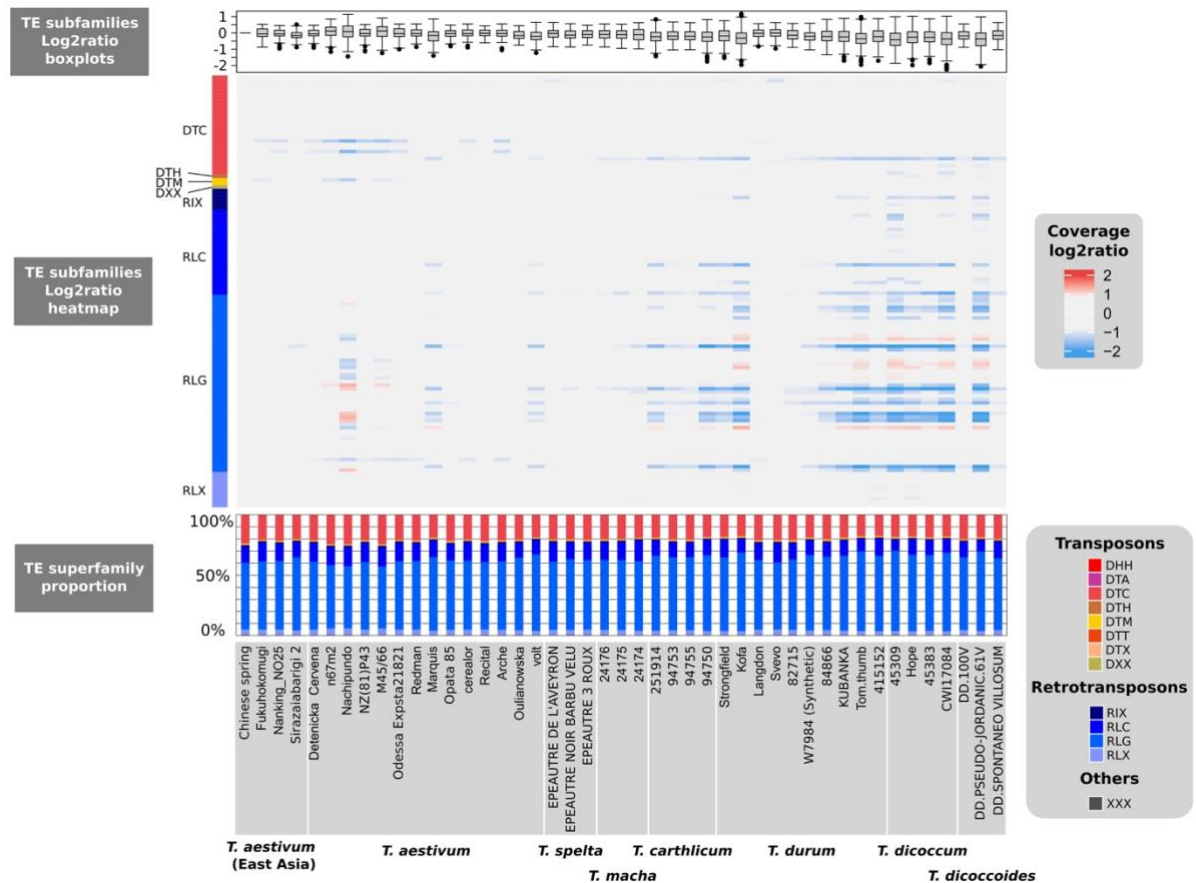

**Figure S6: Variations of TE copy number per family on chr3B for 45 *Triticum* accessions**

The abundance of each TE family (and subfamily) was estimated using DoC relatively to the abundance observed in the reference CS chr3B (expressed as log<sub>2</sub>ratio). Top panel: boxplots of the DoC log<sub>2</sub>ratios for all accessions which names are described at the bottom of the figure. Middle panel: heatmap of the relative abundance of all TE subfamilies compared to CS. Each line represents one TE subfamily. Positive and negative log<sub>2</sub>ratios, indicating higher and lower abundance in comparison to CS are represented in red and blue, respectively. Only subfamilies with a cumulative size of at least 1 kb were considered here. Bottom panel: barplots of the composition in TEs superfamilies for the 45 accessions. RIX: LINEs, RLG: Gypsy, RLC: Copia, RLX: unclassified LTR-retrotransposons, DHH: helitrons, DTA: hAT transposons, DTC: CACTA, DTH: Harbinger, DTM: Mutator, DTT: Mariner, DTX: unclassified transposons with TIRs; DXX: unclassified transposons.

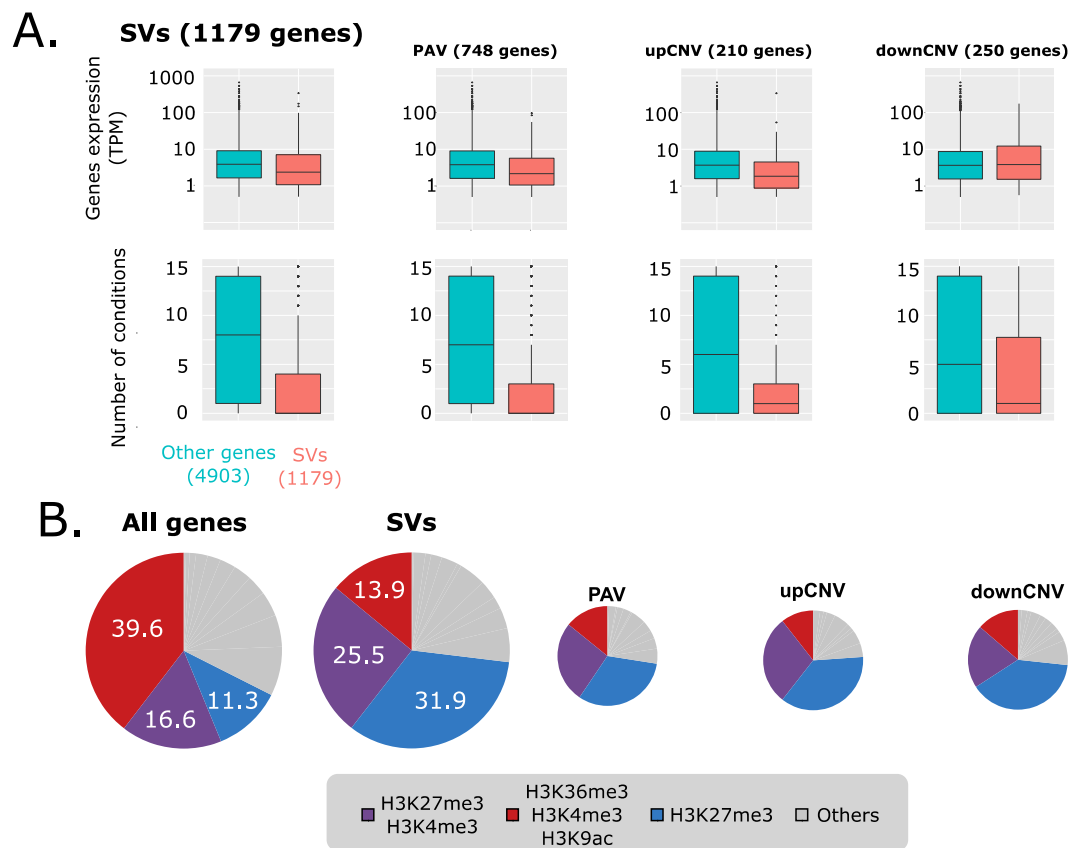

**Figure S7: Expression levels and epigenetic marks associated with genes affected by SVs.**

A. Boxplots of gene expression levels (in TPM; log10 scale) and expression breadths (in number of conditions out of 15 tested) for genes affected by SVs (red) and all other genes (cyan). B. Proportions of genes associated with different combinations of histone marks. The two left pie charts represent these proportions for all genes and genes affected by SVs. The three smaller pie charts on the right show details per type of SVs.

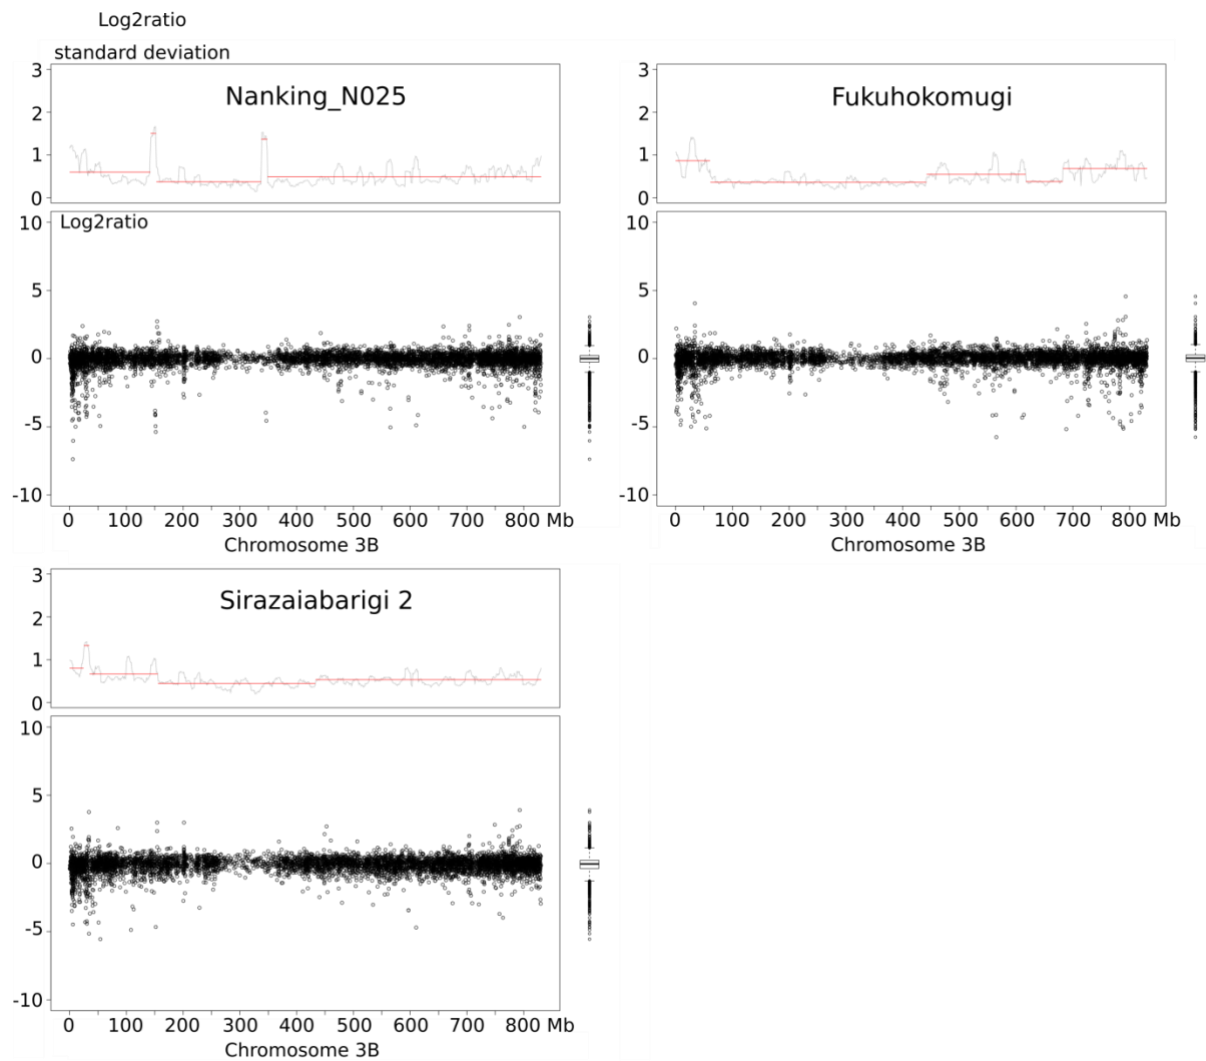

**Figure S8: DoC log2ratios for East-Asian *T. aestivum* accessions**

DoC log2ratios of all genes across chromosome 3B for 3 East-Asian *T. aestivum* accessions and standard deviation calculated in a 10 Mb sliding window (step=1 Mb, R package changepoint, penalty: "BIC", penalty value: 0.05, method: "SegNeigh"). A boxplot of the DoC log2ratios with upper and lower whiskers considered as thresholds to define up and downCNVs is represented on the right.



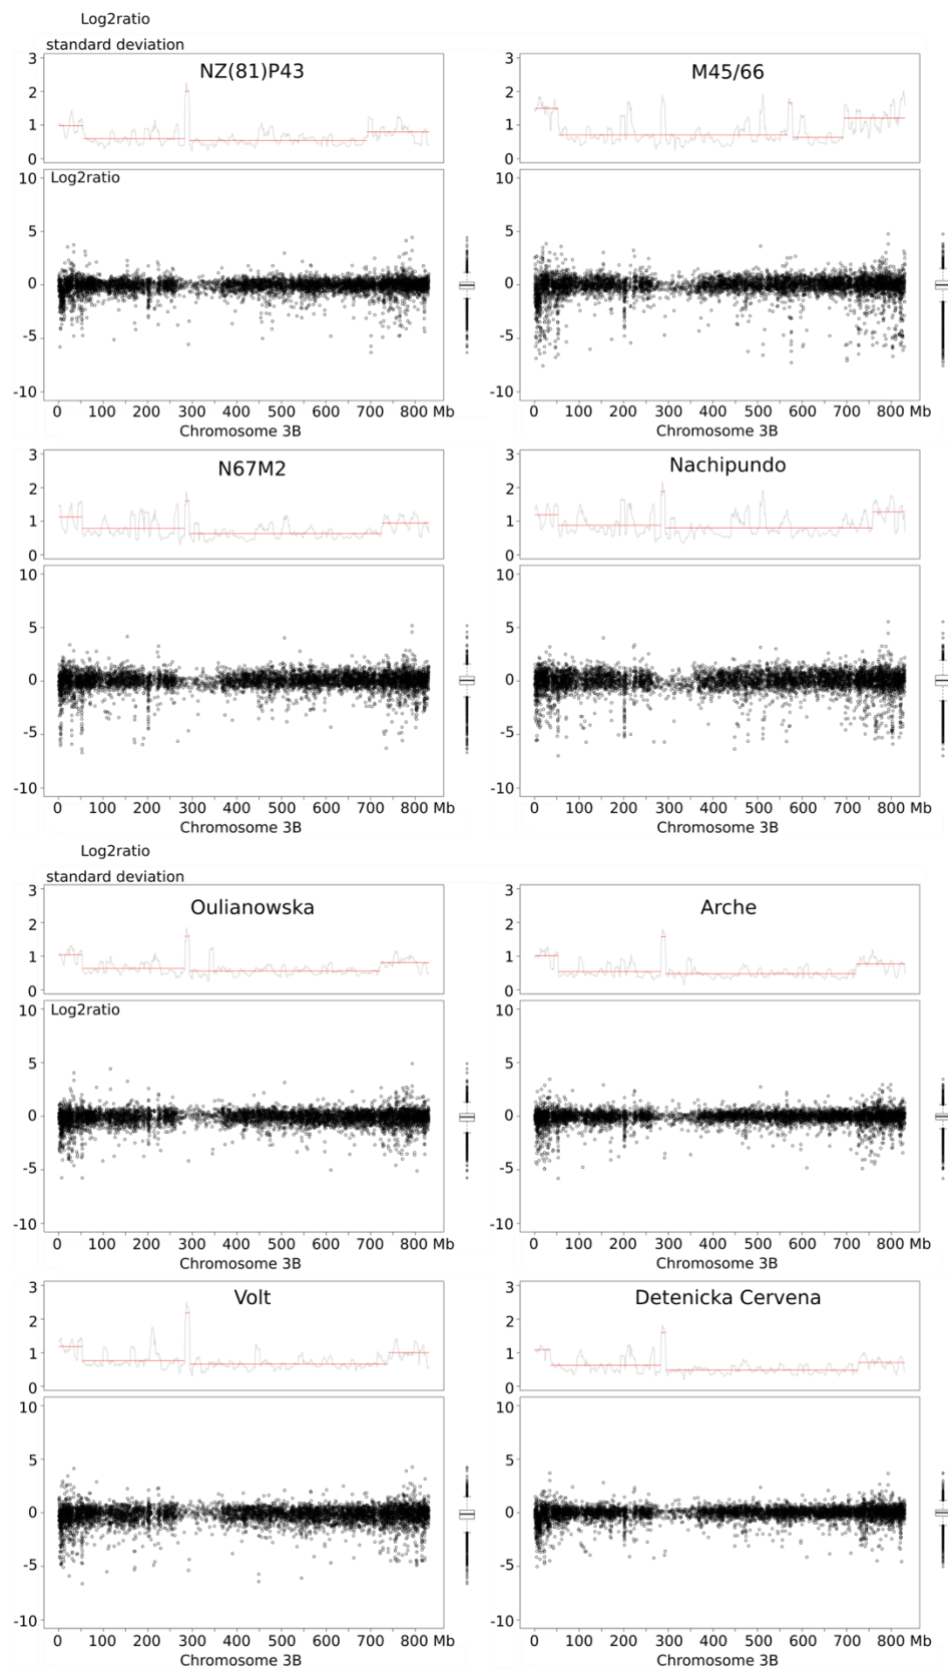

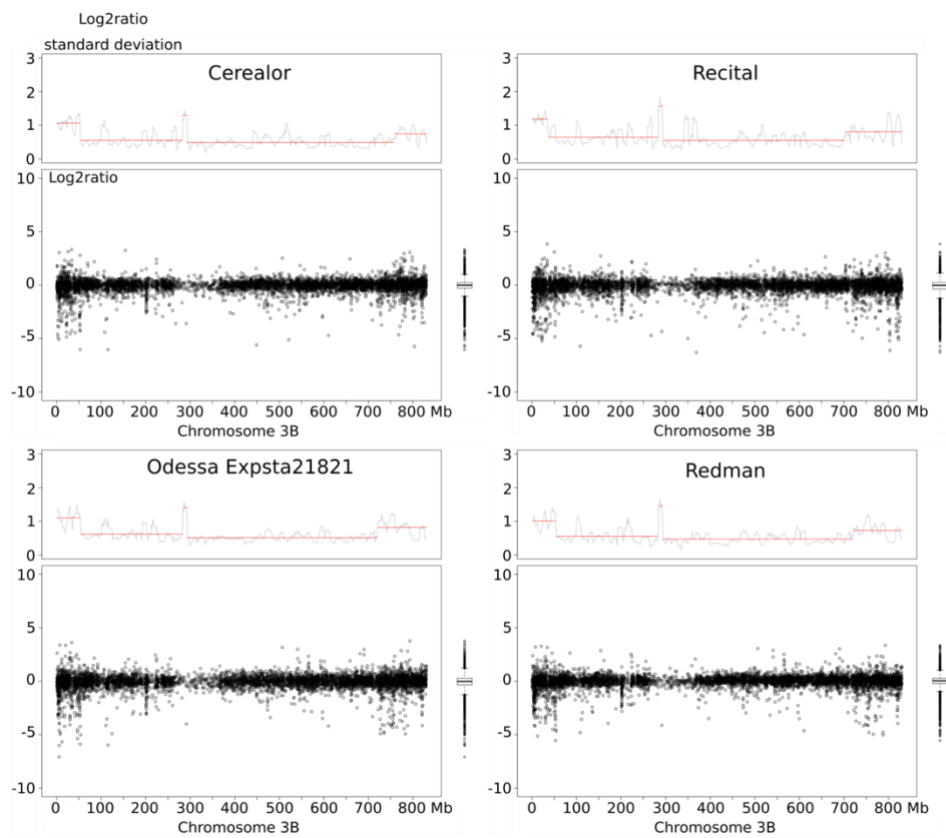

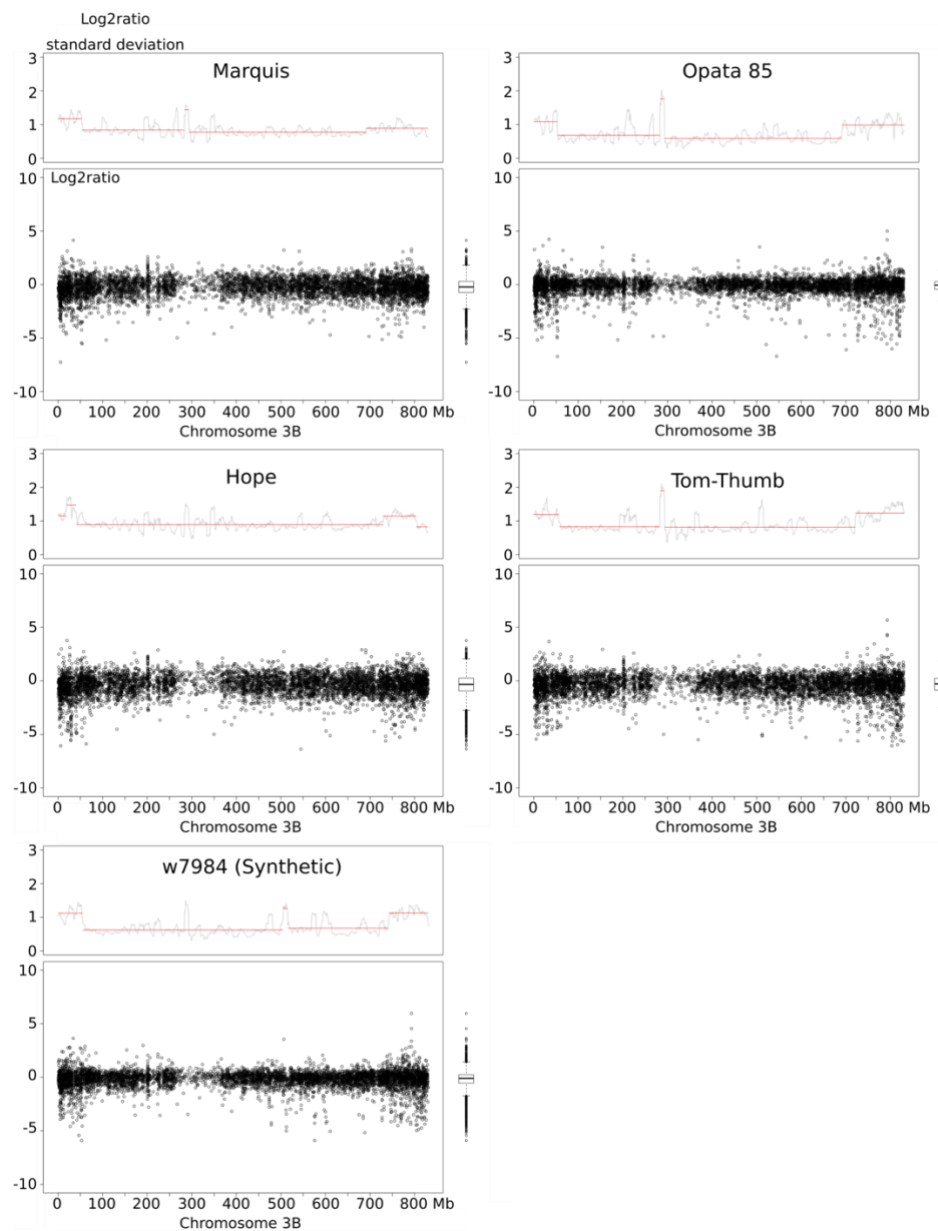

**Figure S9: DoC log2ratios for *T. aestivum* accessions (excluding Asian accessions)**

DoC log2ratios of all genes across chromosome 3B and standard deviation calculated in a 10 Mb sliding window (step=1 Mb, R package changepoint, penalty: "BIC", penalty value: 0.05, method: "SegNeigh"). A boxplot of the DoC log2ratios with upper and lower whiskers considered as thresholds to define up and downCNVs is represented on the right.

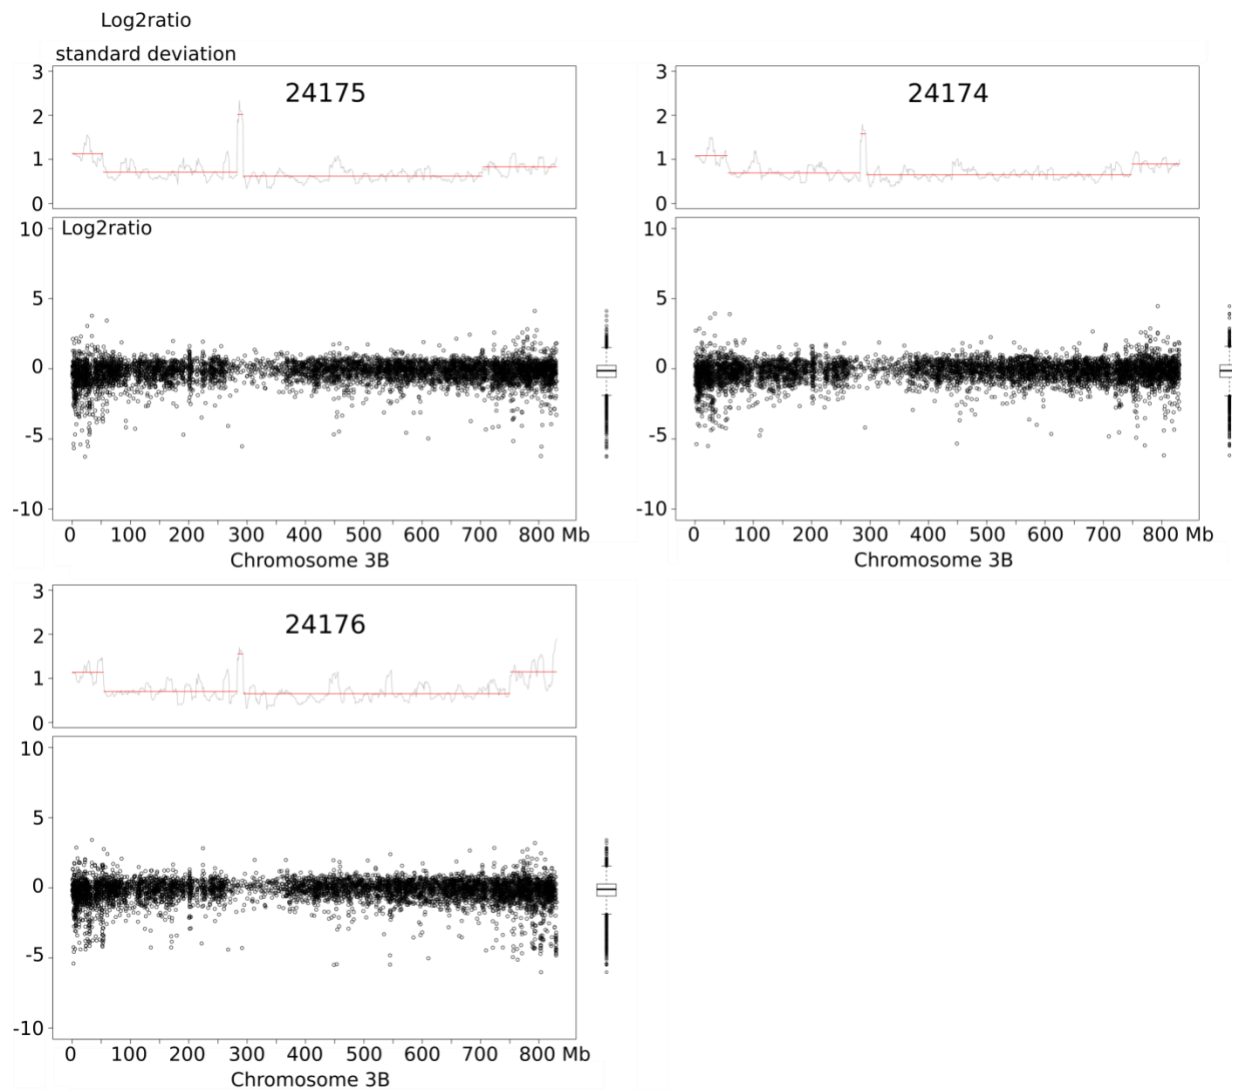

**Figure S10: DoC log2ratios for *T. macha* accessions.**

DoC log2ratios of all genes across chromosome 3B and standard deviation calculated in a 10 Mb sliding window (step=1 Mb, R package changepoint, penalty: "BIC", penalty value: 0.05, method: "SegNeigh"). A boxplot of the DoC log2ratios with upper and lower whiskers considered as thresholds to define up and downCNVs is represented on the right.

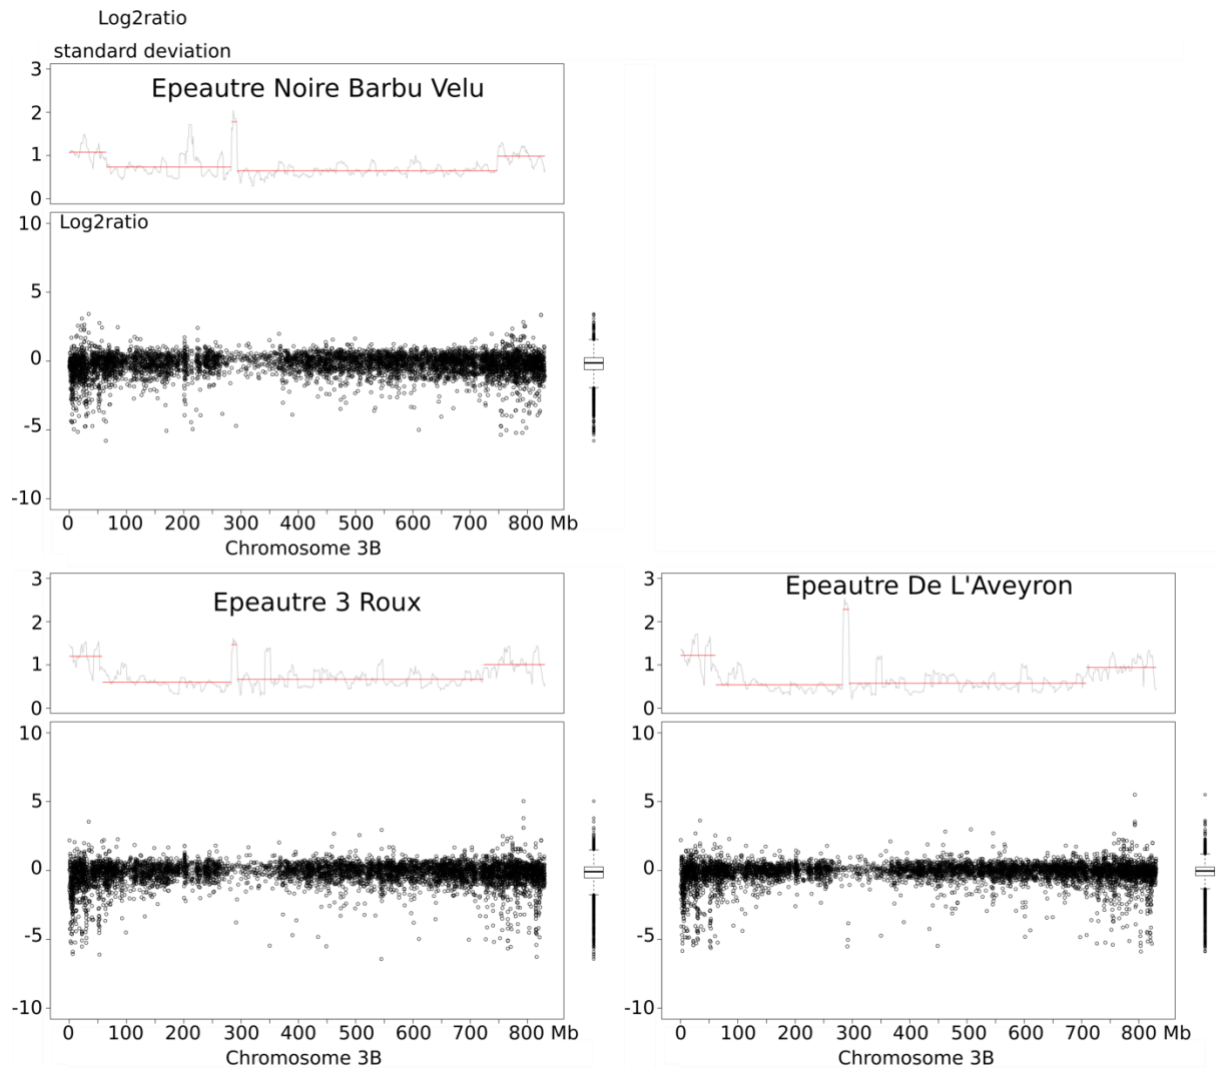

**Figure S11: DoC log2ratios for *T. spelta* accessions.**

DoC log2ratios of all genes across chromosome 3B and standard deviation calculated in a 10 Mb sliding window (step=1 Mb, R package changepoint, penalty: "BIC", penalty value: 0.05, method: "SegNeigh"). A boxplot of the DoC log2ratios with upper and lower whiskers considered as thresholds to define up and downCNVs is represented on the right.

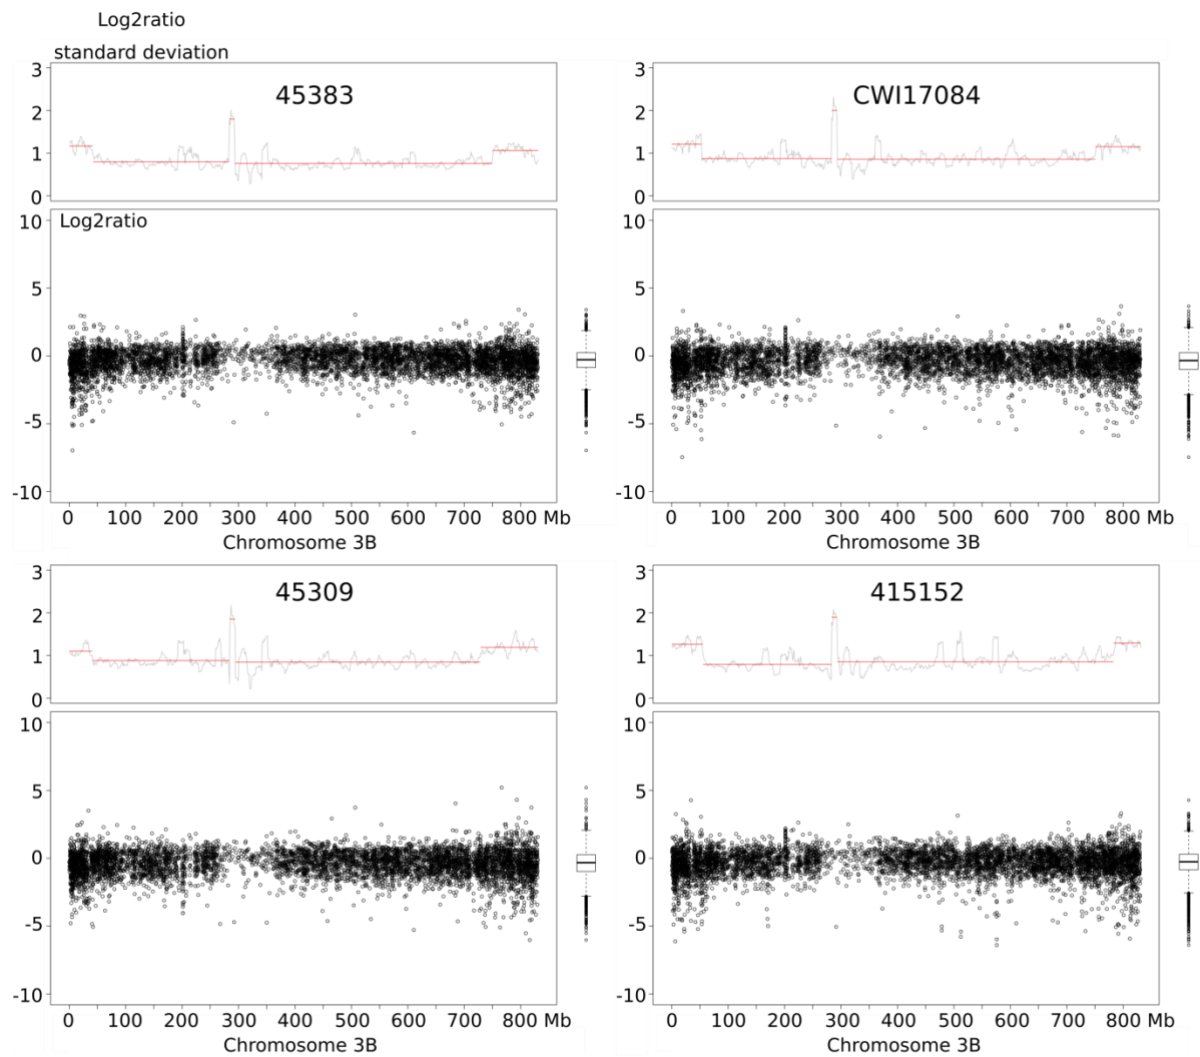

**Figure S12: DoC log2ratios for *T. dicoccum* accessions.**

DoC log2ratios of all genes across chromosome 3B and standard deviation calculated in a 10 Mb sliding window (step=1 Mb, R package changepoint, penalty: "BIC", penalty value: 0.05, method: "SegNeigh"). A boxplot of the DoC log2ratios with upper and lower whiskers considered as thresholds to define up and downCNVs is represented on the right.

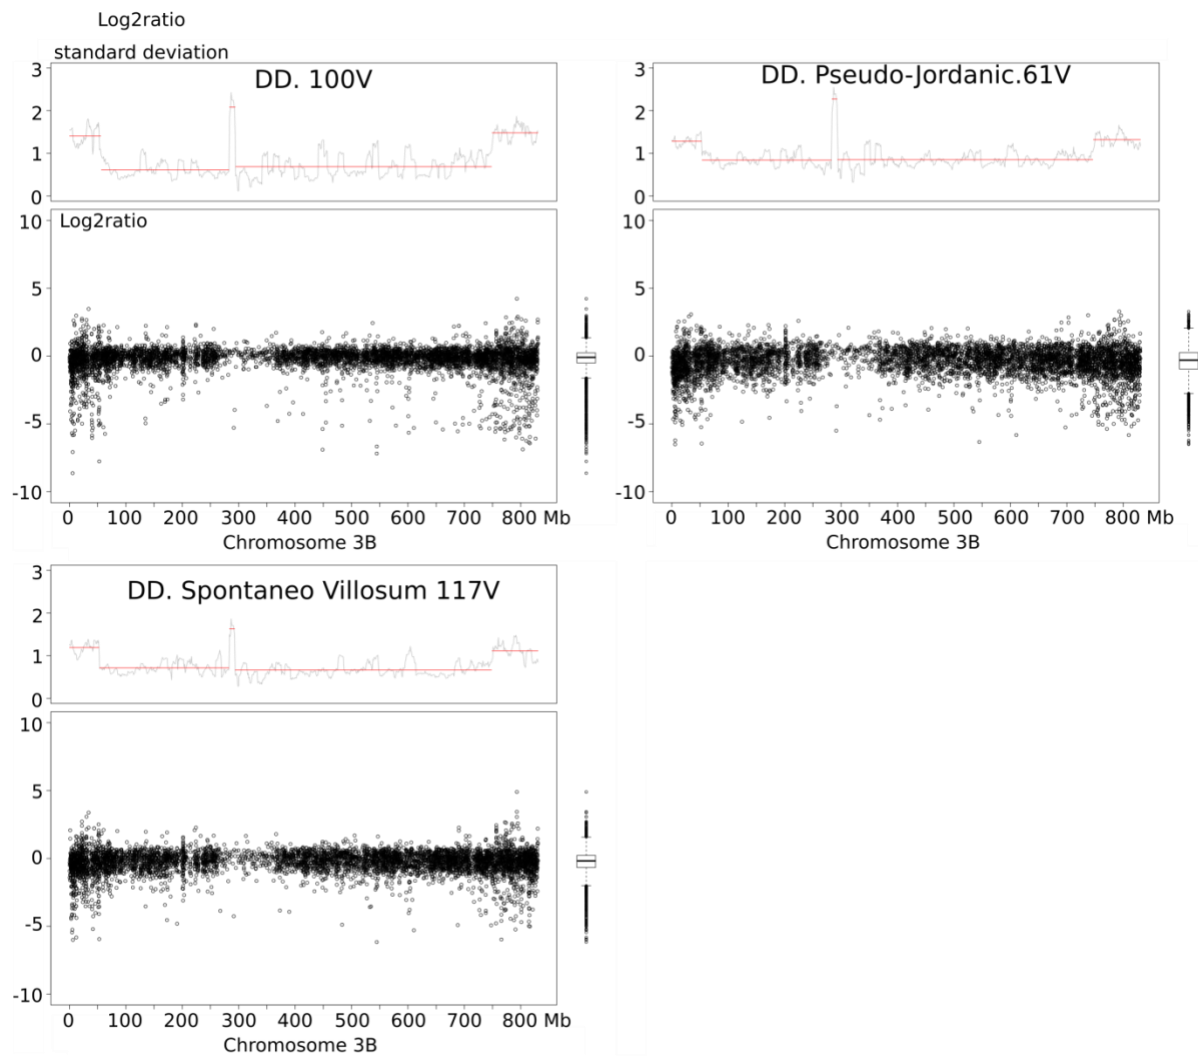

**Figure S13: DoC log2ratios for *T. dicoccoides* accessions.**

DoC log2ratios of all genes across chromosome 3B and standard deviation calculated in a 10 Mb sliding window (step=1 Mb, R package changepoint, penalty: "BIC", penalty value: 0.05, method: "SegNeigh"). A boxplot of the DoC log2ratios with upper and lower whiskers considered as thresholds to define up and downCNVs is represented on the right.

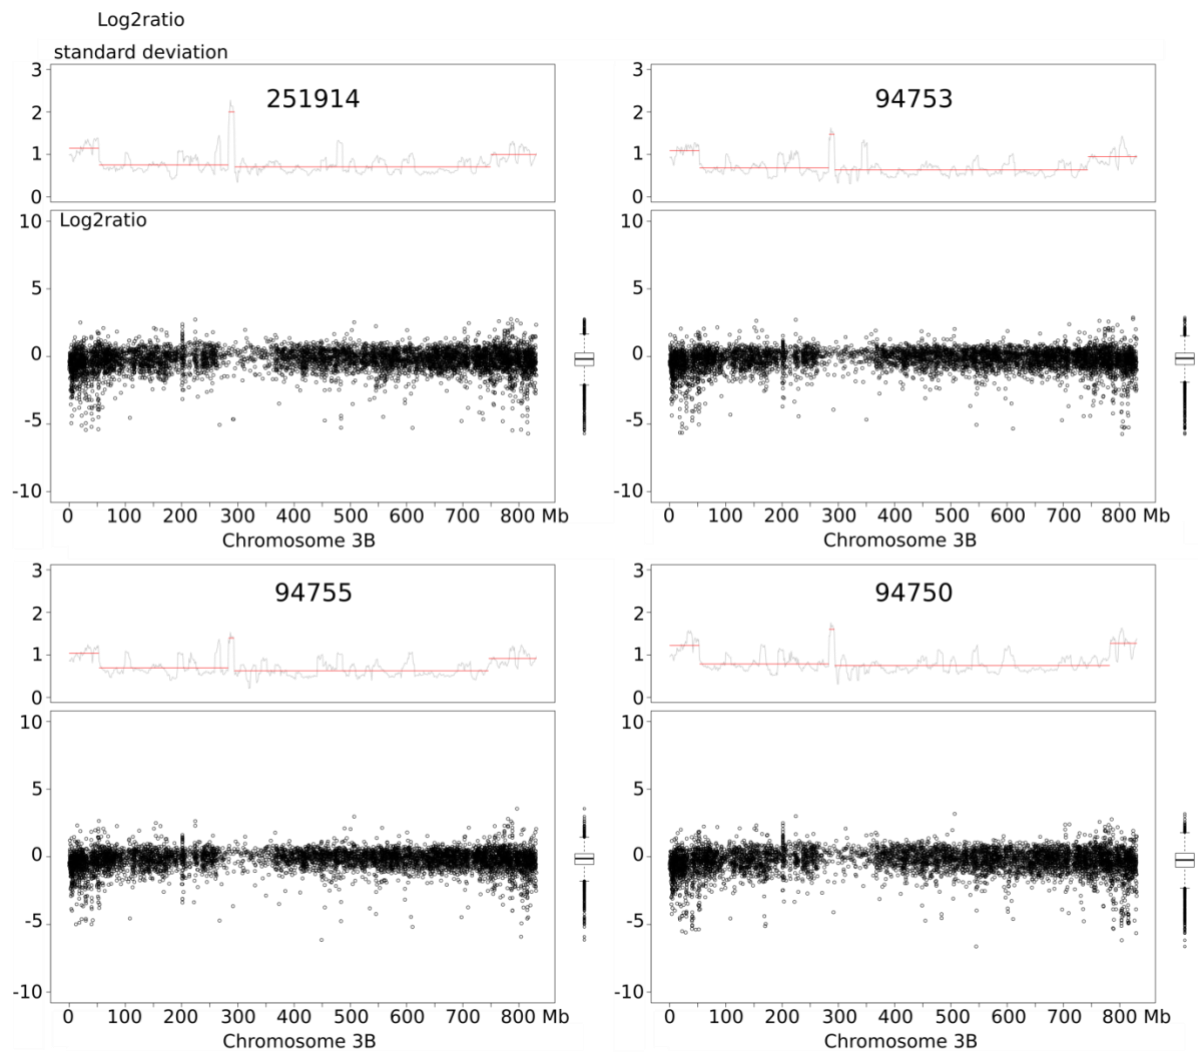

**Figure S14: DoC log2ratios for *T. carthlicum* accessions.**

DoC log2ratios of all genes across chromosome 3B and standard deviation calculated in a 10 Mb sliding window (step=1 Mb, R package changepoint, penalty: "BIC", penalty value: 0.05, method: "SegNeigh"). A boxplot of the DoC log2ratios with upper and lower whiskers considered as thresholds to define up and downCNVs is represented on the right.



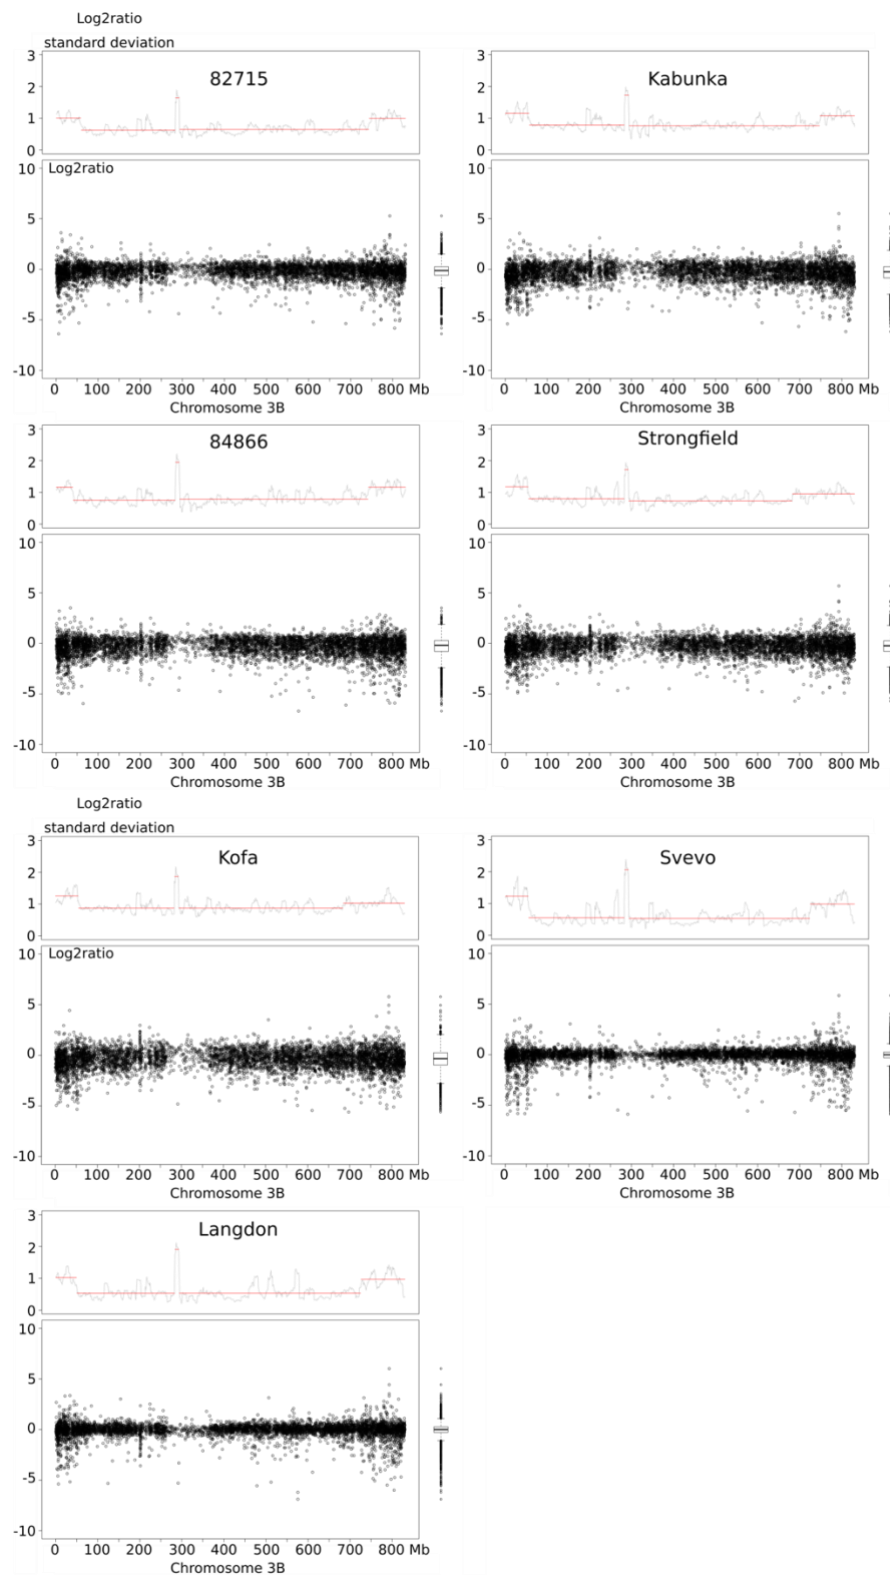

**Figure S15: DoC log2ratios for *T. durum* accessions.**

DoC log2ratios of all genes across chromosome 3B and standard deviation calculated in a 10 Mb sliding window (step=1 Mb, R package changepoint, penalty: "BIC", penalty value: 0.05, method: "SegNeigh"). A boxplot of the DoC log2ratios with upper and lower whiskers considered as thresholds to define up and downCNVs is represented on the right.

**Table S1: Proportions (in %) of reads mapped on chr3B, chr2B, ChrUn, and all other chromosomes (Mapq>11) for the 45 resequencing datasets**

| Species (ploidy) | Accession name             | Chr3B | Chr2B | ChrUn | Others |
|------------------|----------------------------|-------|-------|-------|--------|
| <i>Tae</i> (6x)  | Chinese Spring             | 88    | 3     | 4     | 5      |
| .                | Sirazaibarigi 2            | 88    | 2     | 2     | 7      |
| .                | Nanking_NO25               | 87    | 4     | 2     | 7      |
| .                | Fukuhokomugi               | 82    | 2     | 2     | 14     |
| .                | NZ(81)P43                  | 86    | 2     | 1     | 10     |
| .                | M45/66                     | 85    | 3     | 1     | 11     |
| .                | N67M2                      | 85    | 4     | 1     | 10     |
| .                | Nachipundo                 | 84    | 3     | 1     | 12     |
| .                | Oulianowska                | 88    | 2     | 2     | 9      |
| .                | Arche                      | 87    | 2     | 2     | 9      |
| .                | Volt                       | 86    | 2     | 2     | 11     |
| .                | Detenicka Cervena          | 87    | 2     | 1     | 9      |
| .                | Cerealor                   | 88    | 2     | 1     | 9      |
| .                | Recital                    | 87    | 2     | 2     | 9      |
| .                | Odessa Expsta21821         | 87    | 3     | 2     | 9      |
| .                | Redman                     | 85    | 3     | 2     | 10     |
| .                | Marquis                    | 86    | 2     | 1     | 11     |
| .                | Opata 85                   | 83    | 3     | 1     | 13     |
| .                | Hope                       | 75    | 10    | 1     | 14     |
| .                | Tom Thumb                  | 83    | 3     | 1     | 12     |
| <i>Tma</i> (6x)  | 24175                      | 79    | 4     | 2     | 15     |
| .                | 24174                      | 83    | 4     | 2     | 11     |
| .                | 24176                      | 77    | 2     | 2     | 19     |
| <i>Tsp</i> (6x)  | EPEAUTRE 3 ROUX            | 81    | 2     | 1     | 16     |
| .                | EPEAUTRE DE L'AVEYRON      | 78    | 3     | 1     | 18     |
| .                | EPEAUTRE NOIR BARBU VELU   | 70    | 15    | 1     | 15     |
| <i>Tdi</i> (4x)  | 45383                      | 55    | 30    | 1     | 13     |
| .                | CWI17084                   | 81    | 4     | 1     | 14     |
| .                | 45309                      | 78    | 6     | 1     | 15     |
| .                | 415152                     | 73    | 14    | 1     | 11     |
| <i>Tde</i> (4x)  | DD.100V                    | 79    | 4     | 1     | 16     |
| .                | DD.PSEUDO-JORDANIC.61V     | 75    | 5     | 1     | 19     |
| .                | DD.SPONTANEO VILLOSUM 117V | 75    | 4     | 1     | 20     |
| <i>Tca</i> (4x)  | 251914                     | 80    | 4     | 1     | 14     |
| .                | 94753                      | 82    | 3     | 2     | 13     |
| .                | 94750                      | 80    | 6     | 1     | 12     |
| .                | 94755                      | 64    | 11    | 1     | 24     |
| <i>Tdu</i> (4x)  | 82715                      | 88    | 2     | 1     | 9      |
| .                | KUBANKA                    | 81    | 5     | 1     | 13     |
| .                | 84866                      | 85    | 3     | 1     | 11     |
| .                | Strongfield                | 85    | 4     | 1     | 11     |
| .                | Kofa                       | 81    | 4     | 1     | 13     |
| .                | Langdon                    | 87    | 4     | 1     | 8      |
| .                | Svevo                      | 86    | 3     | 1     | 10     |
| Synthetic (6x)   | W7984 (Synthetic)          | 78    | 8     | 1     | 13     |

**Table S2 :Number of ISBP inDels for each species**

"Unique" indicates the number of inDels that are present in only one accession of the species.  
"Shared" and "All" indicate the number of inDels that are shared by at least 2 accessions and all accessions, respectively.

| Species               | Unique | Shared | All   | Total  |
|-----------------------|--------|--------|-------|--------|
| <i>T. macha</i>       | 16515  | 9517   | 33318 | 59350  |
| <i>T. aestivum</i>    | 33251  | 109708 | 1129  | 144088 |
| (East Asian)          | 27098  | 12092  | 7327  | 46517  |
| (others)              | 33995  | 96679  | 8920  | 139594 |
| <i>T. carthlicum</i>  | 13482  | 12771  | 38048 | 64301  |
| <i>T. dicoccum</i>    | 40098  | 45335  | 22010 | 107443 |
| <i>T. dicoccoides</i> | 18375  | 16847  | 32928 | 68150  |
| <i>T. spelta</i>      | 20357  | 17459  | 31539 | 69355  |
| <i>T. durum</i>       | 32395  | 64238  | 19229 | 115862 |
| All accessions        | 30781  | 155830 | 416   | 186611 |

**Table S3: Number of SVs and newly discovered genes for each accession**

| Species (ploidy) | Accession name             | No. PAVs | No. downCNVs | No. upCNVs | Total no. SVs | No. new genes |
|------------------|----------------------------|----------|--------------|------------|---------------|---------------|
| Tae (6x)         | Sirazaiaabari 2            | 86       | 58           | 22         | 166           | 26            |
| .                | Nanking_NO25               | 55       | 61           | 11         | 127           | 30            |
| .                | Fukuhokomugi               | 85       | 66           | 19         | 170           | 28            |
| .                | NZ(81)P43                  | 151      | 92           | 19         | 262           | 40            |
| .                | M45/66                     | 134      | 99           | 33         | 266           | 71            |
| .                | N67M2                      | 52       | 68           | 21         | 141           | 68            |
| .                | Nachipundo                 | 73       | 66           | 13         | 152           | 50            |
| .                | Oulianowska                | 105      | 67           | 16         | 188           | 50            |
| .                | Arche                      | 155      | 82           | 19         | 256           | 40            |
| .                | Volt                       | 120      | 70           | 19         | 209           | 74            |
| .                | Detenicka Cervena          | 42       | 73           | 19         | 134           | 52            |
| .                | Cerealor                   | 147      | 92           | 26         | 265           | 57            |
| .                | Recital                    | 121      | 84           | 29         | 234           | 46            |
| .                | Odessa Expsta21821         | 118      | 78           | 17         | 213           | 50            |
| .                | Redman                     | 127      | 93           | 22         | 242           | 54            |
| .                | Marquis                    | 150      | 66           | 8          | 224           | 43            |
| .                | Opata 85                   | 134      | 74           | 22         | 230           | 55            |
| .                | Hope                       | 158      | 63           | 7          | 228           | 34            |
| .                | Tom Thumb                  | 138      | 80           | 15         | 233           | 55            |
| Tma (6x)         | 24175                      | 144      | 67           | 24         | 235           | 43            |
| .                | 24174                      | 149      | 62           | 24         | 235           | 46            |
| .                | 24176                      | 140      | 81           | 23         | 244           | 52            |
| Tsp (6x)         | EPEAUTRE 3 ROUX            | 169      | 87           | 23         | 279           | 49            |
| .                | EPEAUTRE DE L'AVEYRON      | 166      | 101          | 34         | 301           | 57            |
| .                | EPEAUTRE NOIR BARBU VELU   | 187      | 71           | 16         | 274           | 45            |
| Tdi (4x)         | 45383                      | 184      | 80           | 14         | 278           | 55            |
| .                | CW117084                   | 211      | 69           | 9          | 289           | 54            |
| .                | 45309                      | 208      | 75           | 11         | 294           | 26            |
| .                | 415152                     | 153      | 68           | 8          | 229           | 59            |
| Tde (4x)         | DD.100V                    | 114      | 105          | 49         | 268           | 78            |
| .                | DD.PSEUDO-JORDANIC.61V     | 131      | 79           | 14         | 224           | 48            |
| .                | DD.SPONTANEO VILLOSUM 117V | 124      | 91           | 30         | 245           | 53            |
| Tca (4x)         | 251914                     | 181      | 71           | 15         | 267           | 50            |
| .                | 94753                      | 187      | 76           | 19         | 282           | 43            |
| .                | 94750                      | 168      | 72           | 11         | 251           | 39            |
| .                | 94755                      | 184      | 79           | 20         | 283           | 41            |
| Tdu (4x)         | 82715                      | 172      | 78           | 29         | 279           | 56            |
| .                | KUBANKA                    | 179      | 89           | 17         | 285           | 44            |
| .                | 84866                      | 217      | 75           | 16         | 308           | 49            |
| .                | Strongfield                | 189      | 85           | 24         | 298           | 50            |
| .                | Kofa                       | 196      | 84           | 11         | 291           | 41            |
| .                | Langdon                    | 152      | 109          | 45         | 306           | 48            |
| .                | Svevo                      | 148      | 116          | 40         | 304           | 47            |
| .                | W7984 (Synthetic)          | 167      | 87           | 29         | 283           | 45            |
